# Supplementary material for: The Optimal Chinese Herbal Injections for Use With Radiotherapy to Treat Esophageal Cancer: A Systematic Review and Bayesian Network Meta-Analysis
Source: PubMed Central journal article supplement (PMC6329258; doi:10.3389/fphar.2018.01470), 2019-01-04
Supplement: Presentation_1.pdf [file Presentation_1.pdf]

## References

1. Yang, Y.M., Song, G.W., 2013. Aidi injection on the quality of life of patients with esophageal cancer clinical research. *Med Aesthetics Cosmetology*. (11), 27-28.
2. Fang, H., 2011. Aidi injection on quality of life in patients with esophageal cancer clinical research. *Health Required*. (6), 30.
3. Zeng, Q.B., Yang, X.H., 2006. Application of aidi injection combined with radiotherapy in the treatment of esophageal cancer. *Anthology of Med*. 25(3), 418-419.
4. Mao, H.Y., Wang, Z., Yuan, X., Han, F., Dong, J.D., 2016. Clinical effect of aidi injection combined with radiotherapy in the treatment of esophageal cancer. *J Clin Med Prac*. 20(24), 97-99.
5. Zhao, K.Y., Ren, Q.Y., Liu, F.L., Wang, Z.X., Yu, J.M., 2010. Efficacy of aidi injection combined with radiotherapy in the treatment of advanced esophageal cancer. *National Med Frontiers China*. 05(15), 41,46.
6. Guo, Y.C., Wang, X.G., Chen, S.P., Wen, M.L., Guo, H.S., 2014. Aidi injection combined with three-dimensional conformal radiotherapy in the treatment of advanced esophageal cancer in 50 cases. *Shaanxi J Tradit Chi Med*. (5), 524-525.
7. Li, M.J., Li, X.Z., Wang, Y.F., Sheng, Y.X., 2014. Effect of aidi injection combined with intensive radiotherapy in the treatment of esophageal cancer. *Chin Prim Health Care*. 28(9), 108-109.
8. Lu, K., Ke, J., Liu, J.J., Wu, X.J., 2006. Clinical observation radiotherapy combined with aidi-injection in the treatment of esophageal carcinoma. *Sichuan J Cancer Control*. 19(4), 236-238.
9. Hu, L.T., Liao, T.L., Liu, S.J., 2010. Clinical observation on the treatment of esophageal cancer by aidi injection combined with accelerated posterior hypersection conformal radiotherapy. *Nei Mongol J Tradit Chinese Med*. 29(16), 91-91.
10. Bai, L.K., 2014. Application of aidi injection in radiotherapy of esophageal cancer in the elderly. *China Heal Care & Nutr*. 24(5), 2833.
11. Zhao, X., 2015. Clinical report on the curative effect of three dimensional conformal radiotherapy combined with aidi injection in esophageal cancer. *For All Heal*. (11), 160-161.
12. Han, J.W., 2008. The role of aidi injection in the radiotherapy of esophageal cancer [J]. *J Med Forum*. 29(11), 68-69.
13. Xing, J.H., 2011. Clinical effect of aidi combined with radiotherapy treatment in the elderly with advanced esophageal cancer. *Mod Prev Med*. 38(19), 4064-4065,4067.
14. Wu, Y.H., 2001. Application of aidi injection in the radiotherapy of esophageal cancer. *China J Cancer Prev Treat*. 8(6), 663-664.
15. Liu, X.P., Wang, F., 2006. Radiotherapy combined with addie injection for the treatment of advanced esophageal cancer in the elderly. *Chinese J Surg Integ Tradit West Med*. 12(2), 109-110.
16. Jiang, S.N., Yang, F., Ma, Z.M., 2010. Clinical observation of sodium cantharidate combined with three-dimensional conformal radiotherapy in the treatment of esophageal cancer. *J Qiqihar Med Coll*. 31(20), 3258-3259.
17. Zhou, M., Shi, J.J., Yan, B.C., 2009. Observation on effect of shenmai injection as an adjuvant therapy on un-resectable esophageal carcinoma. *Int Med Heal Guid News*. 15(11), 35-37.
18. Zhu, G.J., 2013. Clinical report on the curative effect of esophageal cancer combined with accelerated ultrasegmental radiotherapy combined with shenqifuzheng injection. *For All Heal*. (10), 5.
19. Cai, P., Liu, Q.S., Chen, H.H., Li, Y.X., Li, X.H., 2006. Clinical analysis of esophageal cancer patients treated by combined composite Kushen injection and radiotherapy. *Cancer Res Clin*. 18(6), 395-396.
20. Yan, L., Ba, N., Wang, L.J., Zheng, X.K., Zhang, J., Zhang, H.Q., Xing, X., 2015. Study on the application of compound radix sophoraeflavescens in the three dimensional conformal intensity modulated radiotherapy for esophageal carcinoma. *Guangming J Chinese Med*. (8), 1826-1828.
21. Sun, T.Z., 2009. Compound kushen injection combined with radiotherapy in the treatment of advanced esophageal cancer. *China Prac J Med*. 36(24), 70-71.
22. Huang, C.H., Tan, C., Cai, J., 2016. Clinical value of compound kushen injection combined with radiotherapy in the treatment of advanced esophageal cancer in the elderly. *J Nantong Univ*. 36(6), 600-602.
23. Ao, J.F., 2006. Observation on the short-term curative effect of compound kushen injection combined with radiotherapy in the treatment of middle and late esophageal cancer. *PracPrev Med*. 13(3), 743-743.

24. Chen, X.Y., Dai, X.B., Zhang, L., Zhang, X.P., Zhang, J., Zhu, Y.X., Wu, Y.Z., Zhao, B., 2006. Clinical study on combined radiotherapy of compound kushen injection in the treatment of esophageal cancer. *Pharmaceut Care Res.* 6(1),45-47.
25. Sheng, Z.J., Sun, J., Feng, L.J., 2009. Clinical efficacy of compound knshen injection combined with three dimensional conformal radiation therapy for senile patients with stage III esophageal carcinoma. *Eval and Anal Drug-Use in Hosp China.* 9(12), 936-937.
26. Ding, J.Q., Li, J.Z., Li, R.Q., 2011. Clinical observation of compound kushen injection combined with esophageal cancer in the later stage of accelerated ultrasegmented radiotherapy. *China Pharm.* (20), 1870-1872.
27. Li, Z., 2012. Clinical effect of compound kushen injection on esophageal cancer radiotherapy was observed. *J Mil Surgeonin in Southwest China.* 14(1), 152-153.
28. Luo, M., Zhu, Y.Y., 2013. Effect of compound kushen injection on radiation esophagitis. *Med Front.* (15), 179-179.
29. Liu, F.X., 2009. Clinical observation of yansu injection combined with radiotherapy in the treatment of esophageal cancer. *China Prac Med.* 4(29), 131-132.
30. Zhou, D.A., Wang, J., Qiao, X.Y., 2002. Healing effects analysis of radiotherapy concomitant with Huachansu on esophageal cancer. *Mod J IntegTradit Chinese and Western Med.* 11(2), 101-102.
31. Tian, S.P., Shi, S.X., Yang, B.W., 2013. Clinical observation on treatment of senile esophageal cancer with bufalin combined with radiotherapy. *Chinese J Mod Drug Appl.* 7(16), 126.
32. Zhang, F.T., Li, N., 2001. Analysis of efficacy of bufalin combined with radiotherapy in the treatment of esophageal cancer. *Mod J IntegTradit Chinese and Western Med.* 10(16), 1553-1574.
33. Wang, Z.M., Li, H.B., Li, Y.C., Zhang, X.Y., 2010. Stereotactic radiotherapy combined with cinobufotoxin for treating advanced esophagus carcinoma in 28 cases. *China Pharmaceuti.* 19(17), 61-62.
34. He, W.X., Zhu, Y.Y., Li, J., 2007. Effect of astragalus polysaccharide for injection on quality of life of patients with esophageal cancer radiotherapy. *Jiangxi J Tradit Chinese Med.* 38(2), 37-38.
35. Fan, T., 2012. Clinical observation of astragalus injection combined with radiotherapy in the treatment of esophageal cancer. *Nati Med Front China.* (20), 42.
36. An, S.H., 2008. The effect of kangai injection on the radiotherapy of esophageal cancer in the elderly. *Proceedings of the second Chinese and Japanese academic conference on interventional therapy of cancer.* Chinese medical association oncology branch, Chinese cancer society. 1.
37. Zhao, D.L., Zhang, X.Z., Du, P.R., 2006. Clinical study on quality of life for radiotherapy combined with kangai solution. *Chinese J Cancer Prev Treat.* 13(2), 146-147.
38. Wang, W.H., Chen, Q., Jiang, D.W., 2014. Clinical study of Kangai Injection combined with radiotherapy in treatment of advanced esophageal carcinoma. *Drugs & Clinic.* (9), 1032-1035.
39. Mu, Y., Yuan, Y.M., Zhou, J., 2012. Clinical observation of 50 cases of advanced esophageal cancer treated by kangai injection combined with radiation. *Guiding J Tradit Chinese Med Pharmacol.* 18(11), 35-37.
40. Zhang, H.F., 2014. Observation of kang'ai injection combined with radiotherapy for advanced esophageal carcinoma: a clinical comparative study. *Guide of China Med.* (22), 29-30.
41. Wu, Z.P., Wu, X.R., Ji, W., Ji, F., 2013. Observation on curative effect of kangai injection combined with three-dimensional conformal radiotherapy in the treatment of elderly esophageal cancer. *Zhejiang J IntegTradit Chinese and Western Med.* (4), 274-275.
42. Ren, M.Z., Gao, G.W., Wang, Z.H., 2013. Clinical analysis of 28 cases of senile esophageal cancer treated by three-dimensional conformal radiotherapy combined with kangai injection. *Shanxi Med J.* (18), 1039-1041.
43. Ding, H., Liu, X.Y., Wu, Z.J., Liu, J.B., Guan, Z.F., 2013. The radio sensitizing effect of elemene injection in the treatment of advanced esophageal cancer. *J Nantong Univ.* 33(3), 182-184.
44. Zhu, X.G., Li J.L., Chen, B.P., Gao, Y., Zhu, X.L., Chen, Y.L., 2016. Effect of elemene on the therapeutic effect of esophageal cancer in three-dimensional conformal radiotherapy. *China Pharm.* (14), 1963-1966.
45. Wu, J., Ye, J.K., 2011. Clinical observation on esophageal carcinoma treated by radiotherapy combined with lentinan injection. *J Med Res.* 40(4), 128-130.

46. Feng, S.J., 2015. Clinical study on the therapeutic effect of injection of crow's gall cream combined with radiotherapy in patients with esophageal cancer. *China Heal Care Nutr.* (12), 130-131.
47. Li, D.Z., Li, G.M., Wen, S.M., 2011. 28 cases of recurrent esophageal cancer after radiotherapy were treated with three-dimensional conformal radiotherapy combined with crow's gall oil emulsion injection. *Chongqing Med.* 40(2), 170-171.
47. Li, Q., Deng, S.H., Chen, P., 2013. Observation on the curative effect of enhanced radiotherapy combined with crow's gall oil emulsion in the treatment of recurrent esophageal cancer. *Shanxi Med J.* 42(2), 86-87.
48. Jia, Y.S., Wu, S.Q., Lv, S.L., 2008. Clinical analysis on the treatment of advanced esophageal cancer by corvidae oil emulsion and radiation. *China J Chinese Mater Med.* 33(17), 2174-2176.
49. Chen, S.D., Wang, D.F., Jiang, Q.J., Zhu, G.M., 2007. Clinical observation on curative effect of crow gall - seed oil - emulsion injection in advanced esophageal cancer radiotherapy. *J PracTradit Chinese Internal Med.* 21(9), 78-79.
50. Jiang, X.C., Huo, S.X., 2009. Clinical study of yadanzi oil emulsion injection improving efficacy on radiotherapy in treatment of esophageal cancer. *The Chinese and foreign health abstract.* 6(21), 35-36.
51. Kong, X.M., Xu, L.J., Zhang, N., Liu, S.Y., 2004. Clinical observation on treating advanced esophageal cancer with emulsion injection of seminal pil plus radiotherapy. *Zhejiang J integrated Tradit Chinese and Western Med.* 14(6), 339-340.
52. Liu, X.X., Zhu, H., 2010. 28 cases of esophageal cancer were treated by crow's gall milk injection combined with radiotherapy. *Jiangxi J Tradit Chinese Med.* 41(3), 42-43.
53. He, L.J., Luo, H.Q., Xiang, L., 2010. Efficacy of bruceajavanica oil emulsion combined radiotherapy on treating advanced esophageal carcionma. *Chinese J Exp Tradit Med Formulae.* 16(7), 212-214.
54. Qi, J.H., Zhang, L.Z., 2015. Clinical observation on curative effect of crow gallbladder oil emulsion injection combined with conformal radiotherapy on local advanced esophageal carcinoma. *Henan Med Res.* (2), 60-62.
