# Supplementary material for: The Optimal Chinese Herbal Injections for Use With Radiotherapy to Treat Esophageal Cancer: A Systematic Review and Bayesian Network Meta-Analysis
Source: PubMed Central journal article supplement (PMC6329258; doi:10.3389/fphar.2018.01470), 2019-01-04
Supplement: Presentation_2.pdf [file Presentation_2.pdf]

## S2. Quality Evaluation of the Included RCTs

| Study ID      | Randomized method | Follow-up | Blind method | Allocation concealment | Reasons of withdrawal | Inclusion and exclusion criteria | ADRs | Statistical methods | Foundations | Medical ethics | Scores |
|---------------|-------------------|-----------|--------------|------------------------|-----------------------|----------------------------------|------|---------------------|-------------|----------------|--------|
| Yang YM 2013  | 0                 | 0         | 0            | 0                      | 0                     | 1                                | 0    | 1                   | 0           | 1              | 3      |
| Fang H 2011   | 0                 | 0         | 0            | 0                      | 0                     | 1                                | 0    | 1                   | 0           | 1              | 3      |
| Zeng QB 2006  | 0                 | 0         | 0            | 0                      | 0                     | 1                                | 1    | 0                   | 0           | 0              | 2      |
| Mao HY 2016   | 0                 | 0         | 0            | 0                      | 0                     | 1                                | 1    | 0                   | 0           | 0              | 2      |
| Zhao KY 2010  | 0                 | 0         | 0            | 0                      | 0                     | 1                                | 1    | 1                   | 0           | 0              | 3      |
| Guo YC 2014   | 0                 | 0         | 0            | 0                      | 0                     | 1                                | 1    | 1                   | 0           | 0              | 3      |
| Li MJ 2014    | 0                 | 0         | 0            | 0                      | 0                     | 1                                | 1    | 1                   | 0           | 1              | 4      |
| Lu K 2006     | 0                 | 0         | 0            | 0                      | 0                     | 1                                | 1    | 1                   | 0           | 0              | 3      |
| Hu LM 2010    | 0                 | 1         | 0            | 0                      | 0                     | 1                                | 1    | 1                   | 0           | 0              | 4      |
| Bai LK 2014   | 0                 | 0         | 0            | 0                      | 0                     | 1                                | 1    | 1                   | 0           | 0              | 3      |
| Zhao X 2015   | 0                 | 1         | 0            | 0                      | 0                     | 1                                | 1    | 0                   | 0           | 0              | 3      |
| Han JW 2008   | 0                 | 0         | 0            | 0                      | 0                     | 1                                | 1    | 0                   | 0           | 0              | 2      |
| Xing HJ 2011  | 1                 | 1         | 0            | 0                      | 0                     | 1                                | 1    | 1                   | 0           | 1              | 6      |
| Wu YH 2001    | 0                 | 1         | 0            | 0                      | 0                     | 1                                | 1    | 0                   | 0           | 0              | 3      |
| Liu XP 2006   | 0                 | 0         | 0            | 0                      | 0                     | 1                                | 1    | 1                   | 0           | 0              | 3      |
| Jiang SN 2010 | 0                 | 0         | 0            | 0                      | 0                     | 1                                | 0    | 0                   | 0           | 0              | 1      |
| Zhou M 2009   | 1                 | 1         | 0            | 0                      | 0                     | 1                                | 1    | 1                   | 0           | 0              | 5      |
| Zhu GJ 2013   | 0                 | 1         | 0            | 0                      | 0                     | 1                                | 1    | 0                   | 0           | 0              | 3      |
| Cai P 2006    | 0                 | 1         | 0            | 0                      | 0                     | 1                                | 1    | 1                   | 0           | 0              | 4      |
| Yan L 2015    | 1                 | 0         | 0            | 0                      | 0                     | 1                                | 1    | 1                   | 0           | 1              | 5      |

|               |   |   |   |   |   |   |   |   |   |   |   |
|---------------|---|---|---|---|---|---|---|---|---|---|---|
| Sun TZ 2009   | 0 | 1 | 0 | 0 | 0 | 1 | 1 | 0 | 0 | 0 | 3 |
| Huang CH 2016 | 1 | 1 | 0 | 0 | 0 | 1 | 1 | 1 | 0 | 0 | 5 |
| Ao JF 2006    | 0 | 0 | 0 | 0 | 0 | 1 | 1 | 1 | 0 | 0 | 3 |
| Chen XY 2006  | 0 | 1 | 0 | 0 | 0 | 1 | 1 | 1 | 0 | 0 | 4 |
| Sheng ZJ 2009 | 0 | 0 | 0 | 0 | 0 | 1 | 1 | 1 | 0 | 0 | 3 |
| Ding JQ 2011  | 0 | 1 | 0 | 0 | 0 | 1 | 1 | 1 | 0 | 0 | 4 |
| Li Z 2012     | 1 | 0 | 0 | 0 | 0 | 1 | 1 | 1 | 0 | 0 | 4 |
| Luo M 2013    | 0 | 0 | 0 | 0 | 0 | 1 | 1 | 0 | 0 | 0 | 2 |
| Liu FX 2009   | 0 | 0 | 0 | 0 | 0 | 1 | 1 | 0 | 0 | 0 | 2 |
| Zhou DA 2002  | 0 | 0 | 0 | 0 | 0 | 1 | 1 | 1 | 0 | 0 | 3 |
| Tian SP 2013  | 0 | 0 | 0 | 0 | 0 | 1 | 1 | 0 | 0 | 0 | 2 |
| Zhang FT 2001 | 0 | 1 | 0 | 0 | 0 | 1 | 0 | 0 | 0 | 0 | 2 |
| Wang ZM 2010  | 0 | 0 | 0 | 0 | 0 | 1 | 1 | 1 | 0 | 0 | 3 |
| He WX 2007    | 0 | 0 | 0 | 0 | 0 | 1 | 0 | 1 | 0 | 1 | 3 |
| Fan T 2012    | 0 | 0 | 0 | 0 | 0 | 1 | 1 | 0 | 0 | 0 | 2 |
| An SH 2008    | 0 | 0 | 0 | 0 | 0 | 1 | 0 | 0 | 0 | 0 | 1 |
| Zhao DL 2006  | 1 | 0 | 0 | 0 | 0 | 1 | 0 | 1 | 0 | 0 | 3 |
| Wang WH 2014  | 1 | 0 | 0 | 0 | 0 | 1 | 1 | 1 | 0 | 1 | 5 |
| Mu Y 2012     | 0 | 0 | 0 | 0 | 0 | 1 | 0 | 1 | 0 | 0 | 2 |
| Zhang HF 2014 | 0 | 0 | 0 | 0 | 0 | 1 | 1 | 1 | 0 | 0 | 3 |
| Wu ZP 2013    | 1 | 1 | 0 | 0 | 0 | 1 | 1 | 1 | 0 | 0 | 5 |
| Ren MZ 2013   | 1 | 0 | 0 | 0 | 0 | 1 | 1 | 1 | 0 | 0 | 4 |
| Ding H2013    | 0 | 0 | 0 | 0 | 0 | 1 | 1 | 1 | 1 | 0 | 4 |

|               |   |   |   |   |   |   |   |   |   |   |   |
|---------------|---|---|---|---|---|---|---|---|---|---|---|
| Zhu XG 2016   | 1 | 1 | 0 | 0 | 0 | 1 | 1 | 1 | 0 | 1 | 6 |
| Wu J 2011     | 0 | 0 | 0 | 0 | 0 | 1 | 1 | 1 | 0 | 1 | 4 |
| Feng SJ 2015  | 0 | 0 | 0 | 0 | 0 | 1 | 1 | 1 | 0 | 0 | 3 |
| Li DZ 2011    | 0 | 0 | 0 | 0 | 0 | 1 | 1 | 1 | 0 | 0 | 3 |
| Li Q 2013     | 0 | 1 | 0 | 0 | 0 | 1 | 1 | 1 | 0 | 0 | 4 |
| Jia YS 2008   | 0 | 1 | 0 | 0 | 0 | 1 | 1 | 1 | 0 | 0 | 4 |
| Chen SD 2007  | 0 | 0 | 0 | 0 | 0 | 1 | 1 | 1 | 0 | 0 | 3 |
| Jiang XC 2009 | 0 | 0 | 0 | 0 | 0 | 1 | 1 | 1 | 0 | 0 | 3 |
| Kong XM 2004  | 0 | 1 | 0 | 0 | 0 | 1 | 1 | 0 | 0 | 0 | 3 |
| Liu XX 2010   | 0 | 0 | 0 | 0 | 0 | 1 | 1 | 1 | 0 | 0 | 3 |
| He LJ 2010    | 0 | 0 | 0 | 0 | 0 | 1 | 1 | 1 | 0 | 0 | 3 |
| Qi JH 2015    | 0 | 0 | 0 | 0 | 0 | 1 | 1 | 0 | 0 | 0 | 2 |

Note: 1=report; 0=not report
